# Supplementary material for: Investigation of the promotion effect of WO3 on the decomposition and reactivity of NH4HSO4 with NO on V2O5–WO3/TiO2 SCR catalysts
Source: Royal Society of Chemistry journal article supplement (doi:10.1039/c6ra09072a), 2016-01-01
Supplement: c6ra09072a1.pdf [file c6ra09072a1.pdf]

## Supporting information

### Investigation of the promotion effect of $\text{WO}_3$ on the decomposition and reactivity of $\text{NH}_4\text{HSO}_4$ with NO on $\text{V}_2\text{O}_5\text{-WO}_3/\text{TiO}_2$ SCR catalysts

Dong Ye, Ruiyang Qu, Hao Song, Chenghang Zheng, Xiang Gao\*, Zhongyang Luo, Mingjiang Ni, Kefa Cen  
*State Key Laboratory of Clean Energy Utilization, Department of Energy Engineering, Zhejiang University, Hangzhou, 310027, China*

Corresponding author. Tel.: +86 571 87951335;

*E-mail address:* [xgao1@zju.edu.cn](mailto:xgao1@zju.edu.cn) (X. Gao)

## Figures captions

**Fig. S1** XRD patterns of series Ti-based samples

**Fig. S2** FTIR spectra:  $\text{NH}_4\text{HSO}_4$ -free catalysts

**Fig. S3** (a) TPSR profiles of  $\text{NH}_4\text{HSO}_4$  with NO; Condition: 1000 ppm NO + 3%  $\text{O}_2$  in  $\text{N}_2$  at  $1.2 \text{ L min}^{-1}$ ; Heating rate:  $5 \text{ }^\circ\text{C min}^{-1}$ ; 0.4 g samples; (b) TPSR profiles of  $\text{NH}_3$ : 1000 ppm NO + 3%  $\text{O}_2$  in  $\text{N}_2$  at  $1.2 \text{ L min}^{-1}$ ; Heating rate:  $5 \text{ }^\circ\text{C min}^{-1}$ ; 0.4 g samples;; (c) TPSR profiles of  $\text{N}_2\text{O}$ : 1000 ppm NO + 3%  $\text{O}_2$  in  $\text{N}_2$  at  $1.2 \text{ L min}^{-1}$ ; Heating rate:  $5 \text{ }^\circ\text{C min}^{-1}$ ; 0.4 g samples; (d) FTIR spectra of the  $\text{NH}_4\text{HSO}_4$ -deposited samples after the TPSR process

**Fig. S4** (a) *In situ* DRIFTS study of the  $\text{NH}_4\text{HSO}_4$  behavior in  $\text{N}_2$  at  $250 \text{ }^\circ\text{C}$ ; (b) *In situ* DRIFTS study of the reactivity behavior of  $\text{NH}_4\text{HSO}_4$  with NO on the VW/Ti catalyst surface at  $250 \text{ }^\circ\text{C}$

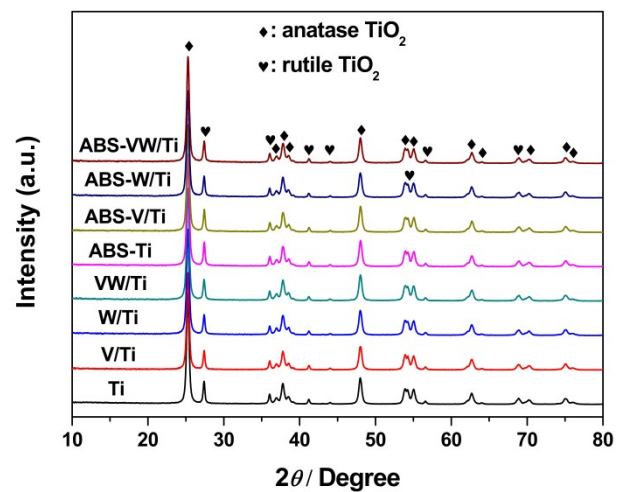

Fig. S1 XRD patterns of series Ti-based samples

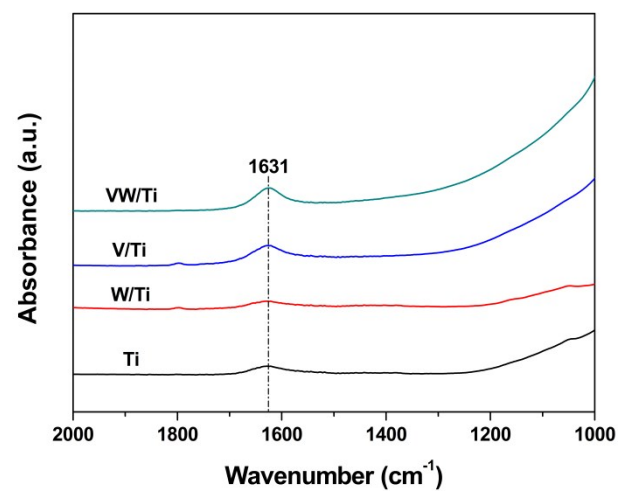

Fig. S2 FTIR spectra: NH<sub>4</sub>HSO<sub>4</sub>-free catalysts

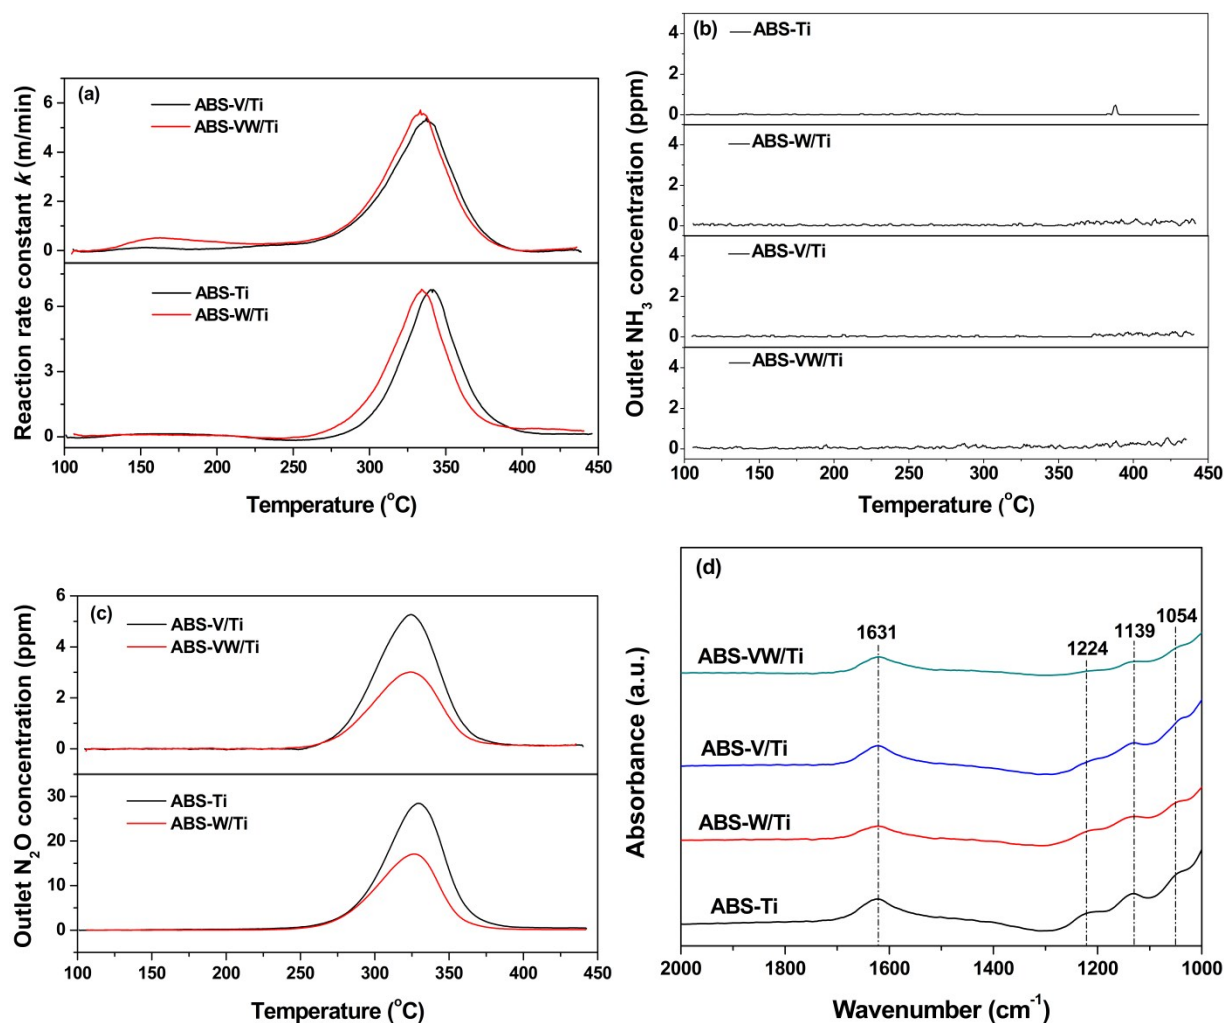

**Fig. S3** (a) TPSR profiles of  $\text{NH}_4\text{HSO}_4$  with  $\text{NO}$ ; Condition: 1000 ppm  $\text{NO}$  + 3%  $\text{O}_2$  in  $\text{N}_2$  at  $1.2 \text{ L min}^{-1}$ ; Heating rate:  $5 \text{ }^\circ\text{C min}^{-1}$ ; 0.4 g samples; (b) TPSR profiles of  $\text{NH}_3$ : 1000 ppm  $\text{NO}$  + 3%  $\text{O}_2$  in  $\text{N}_2$  at  $1.2 \text{ L min}^{-1}$ ; Heating rate:  $5 \text{ }^\circ\text{C min}^{-1}$ ; 0.4 g samples;; (c) TPSR profiles of  $\text{N}_2\text{O}$ : 1000 ppm  $\text{NO}$  + 3%  $\text{O}_2$  in  $\text{N}_2$  at  $1.2 \text{ L min}^{-1}$ ; Heating rate:  $5 \text{ }^\circ\text{C min}^{-1}$ ; 0.4 g samples; (d) FTIR spectra of the  $\text{NH}_4\text{HSO}_4$ -deposited samples after the TPSR process

Fig. S3(a) illustrates the  $\text{NO}$  TPSR profiles with  $\text{NH}_4\text{HSO}_4$  on the W-free or W-added catalysts. Variations in the reaction rate constant reflect the reactivity behavior of  $\text{NH}_4\text{HSO}_4$  with  $\text{NO}$ . In the case of  $\text{NH}_4\text{HSO}_4$  deposited on the Ti catalyst, this reaction starts at *ca.*  $275 \text{ }^\circ\text{C}$ , as is illustrated by the increased reaction rate constant. With increasing temperature, the reaction rate constant continuously increases, whose highest point is at *ca.*  $340 \text{ }^\circ\text{C}$ . The reaction rate constant then begins to decline and gradually restores to 0, which illustrates the depletion of  $\text{NH}_4^+$  on the catalyst surface. As for the  $\text{NH}_4\text{HSO}_4$  reactivity behavior on the W/Ti catalyst, a little higher reaction rate constant of  $\text{NH}_4\text{HSO}_4$  with  $\text{NO}$  occurs in the temperature region of  $250\text{--}330 \text{ }^\circ\text{C}$ . Similar phenomenon can be seen in

the V-doped samples that  $\text{WO}_3$  addition has a slight promotion effect on the  $\text{NH}_4\text{HSO}_4$  reactivity behavior at low-temperature regions, because of the higher reaction rate constant below *ca.* 330 °C and a decline in the temperature for the maximum reaction rate constant. Fig. S3(c) illustrates the outlet  $\text{N}_2\text{O}$  (the unwanted byproduct) concentration during the TPSR process for the  $\text{NH}_4\text{HSO}_4$ -deposited samples. Considering the fairly low outlet  $\text{NH}_3$  concentration (lower than 1 ppm), it can be concluded that the addition of  $\text{WO}_3$  leads to an enhancement in the catalytic selectivity to  $\text{N}_2$  during the TPSR process. In order to identify the variations in the surface functional groups during reaction, FTIR was applied. As shown in Fig. S3(d), four characteristic peaks assigned to  $\text{H}_2\text{O}$  and bidentate  $\text{SO}_4^{2-}$  are observed after reaction. The disappearance of  $\text{NH}_4^+$  characteristic peak illustrates the depletion of  $\text{NH}_4^+$  on the catalyst surface after the exposure in an NO-containing flue gas.

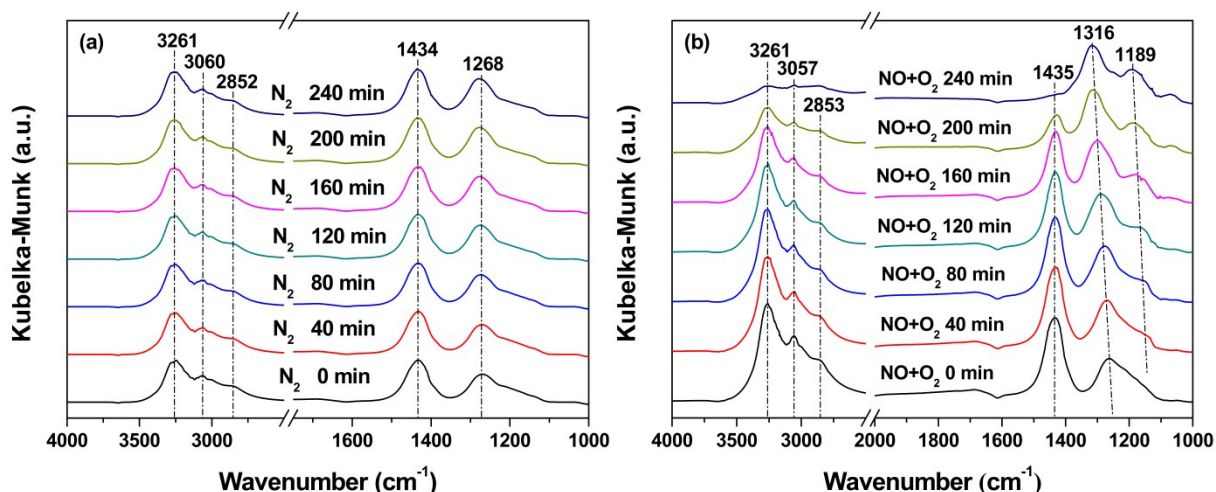

Fig. S4 (a) *In situ* DRIFTS study of the  $\text{NH}_4\text{HSO}_4$  behavior in  $\text{N}_2$  at 250 °C; (b) *In situ* DRIFTS study of the reactivity behavior of  $\text{NH}_4\text{HSO}_4$  with NO on the VW/Ti catalyst surface at 250 °C

Based on the TG-DTG results, the decomposition behavior of  $\text{NH}_4\text{HSO}_4$  on the catalyst surface is greatly enhanced at a temperature higher than 300 °C. Therefore, the increasing reaction rate constant during the heat process might be related to the accelerated reaction between NO and  $\text{NH}_3$  coming from the decomposition of  $\text{NH}_4\text{HSO}_4$ . In order to investigate the detailed reactivity behavior of  $\text{NH}_4\text{HSO}_4$  with NO on the VW/Ti catalyst surface, a special experiment should be conducted at a constant temperature. According to the IR spectra in Fig. 8 and S4(a), it seems that  $\text{NH}_4\text{HSO}_4$  remains almost unchanged below 250 °C. Therefore, a temperature at or below 250 °C should be chosen to avoid the  $\text{NH}_4\text{HSO}_4$  decomposition behavior. As is shown in Fig. S4(b), characteristic bands at 1262 and 1435  $\text{cm}^{-1}$ , which can be attributed to the asymmetrical stretching vibrations of S=O in bidentate  $\text{SO}_4^{2-}$  and  $\text{NH}_4^+$  bonded to Bronsted acid sites, come out <sup>1</sup>. With the introduction of NO + O<sub>2</sub>, a decrease in the intensity of the band attributed to  $\text{NH}_4^+$  occurs, illustrating the gradual consumption of  $\text{NH}_4^+$  on the catalyst. Given an ongoing reaction process, a characteristic band at 1138  $\text{cm}^{-1}$  which is assigned to the symmetrical stretching vibrations of S=O in bidentate  $\text{SO}_4^{2-}$ , appears <sup>2</sup>. The bidentate sulfate species undergo a blue shift during the reaction process together with the occurrence of a slight increase in the intensity of the  $\text{SO}_4^{2-}$  bands, which might be attributed to the gradual consumption of  $\text{NH}_4^+$  bonded to sulfate sites <sup>3</sup>.

## Reference

1. F. Liu, K. Asakura, H. He, W. Shan, X. Shi and C. Zhang, *Appl. Catal. B.*, 2011, **103**, 369-377.
2. J. P. Chen and R. T. Yang, *J. Catal.*, 1993, **139**, 277-288.
3. B. Q. Jiang, Z. B. Wu, Y. Liu, S. C. Lee and W. K. Ho, *J. Phys. Chem. C*, 2010, **114**, 4961-4965.
